# Supplementary material
Source: publisher figshare collection journal article supplement (https://tandf.figshare.com/ndownloader/files/17710979)
Supplement: Supplementary file 1 [file 17710979]

**Supplemental Documents – Full Questionnaires and Results**

**Gains Questionnaire**

Please indicate how much you gained for each item as a result of the internship, from no gain (1) to extreme gain (5). Most of these statements were made by your fellow interns, but we want to know how much they apply to you. Remember there are no right or wrong answers, and we don’t expect you to gain in everything, since everyone reacts differently.

|  | Mary | Natasha | Emily | Rashid | Karl | average |
| --- | --- | --- | --- | --- | --- | --- |
| Confidence in geology | 5 | 4 | 4 | 3 |  | 4 |
| Sense that it’s okay to “mess up” sometimes | 5 | 5 | 5 | 4 |  | 4.75 |
| Confidence of success if/when attend another school | 5 | 4 | 3 | 4 |  | 4 |
| An understanding of what happens when I push myself physically | 4 | 2 | 5 | 4 |  | 3.75 |
| An understanding of what happens when I push myself mentally | 5 | 2 | 5 | 4 |  | 4 |
| Proof that I can be a geologist | 4 | 4 | 4 | 3 |  | 3.75 |
| Realization that I can do NASA science | 4 | 3 | 3 | 3 |  | 3.25 |
| An appreciate that hard work and effort leads to results | 5 | 2 | 5 | 5 |  | 4.25 |
| A feeling that being a geologist is attainable for me | 5 | 4 | 3 | 4 |  | 4 |
| A confidence that I can succeed in other science classes | 5 | 4 | 3 | 3 |  | 3.75 |
| Confidence that I can successfully work in a group | 3 | 4 | 4 | 4 |  | 3.75 |
| People to ask questions to about geology in the future | 5 | 3 | 5 | 3 |  | 4 |
| Knowledge of what it’s like to major in geology | 4 | 4 | 3 | 3 |  | 3.5 |
| Knowledge of geology | 5 | 4 | 3 | 4 |  | 4 |
| Knowledge of chemistry | 3 | 3 | 3 | 4 |  | 3.25 |
| Ability to collect field data (water, cores) | 5 | 4 | 4 | 5 |  | 4.5 |
| Communication skills with diverse people | 3 | 4 | 3 | 4 |  | 3.5 |
| How to use Excel more effectively | 3 | 3 | 3 | 4 |  | 3.25 |
| Planning and organization skills | 3 | 3 | 2 | 4 |  | 3 |
| Knowledge of different methods of collecting data | 5 | 4 | 3 | 4 |  | 4 |
| Sense of how complex geology can be | 5 | 4 | 5 | 4 |  | 4.5 |
| Scientific writing skills | 4 | 3 | 4 | 4 |  | 3.75 |
| Leadership skills | 4 | 3 | 3 | 4 |  | 3.5 |
| How to think like a geologist | 4 | 4 | 3 | 4 |  | 3.75 |
| Friends in geology | 5 | 5 | 5 | 4 |  | 4.75 |
| Appreciation for the importance of diversity in geology | 5 | 4 | 5 | 5 |  | 4.75 |
| Ability see self as a geologist | 5 | 5 | 4 | 3 |  | 4.25 |
| A feeling that I fit in | 5 | 3 | 3 | 4 |  | 3.75 |
| Sense of belonging to geology | 5 | 4 | 3 | 3 |  | 3.75 |
| An understanding of what geologists do | 4 | 5 | 5 | 4 |  | 4.5 |
| Respect for geologists | 5 | 5 | 3 | 5 |  | 4.5 |
| Knowledge of what doing geology in the field is like | 4 | 5 | 4 | 5 |  | 4.5 |
| A better understanding of career options in geology | 4 | 5 | 3 | 4 |  | 4 |
| Understanding of different paths people have taken in their geology careers | 4 | 4 | 3 | 5 |  | 4 |
| Sense of how hard geologists work | 4 | 4 | 4 | 5 |  | 4.25 |
| Better idea of what parts of geology I like or dislike | 5 | 4 | 4 | 4 |  | 4.25 |
| Knowledge how to get to grad school in geology | 3 | 4 | 1 | 3 |  | 2.75 |
| Desire to go to grad school | 5 | 5 | 3 | 3 |  | 4 |
| The knowledge that I can do an internship in geology in the future | 5 | 5 | 4 | 4 |  | 4.5 |
| Encouragement from others on the trip to continue in geology | 5 | 5 | 5 | 3 |  | 4.5 |
| Encouragement from my family to continue in geology | 5 | 4 | 4 | 3 |  | 4 |
| A better resume | 4 | 4 | 4 | 5 |  | 4.25 |
| An experience to talk to other geologists about in the future | 5 | 5 | 4 | 5 |  | 4.75 |
| Understanding of geology that will help me understand content in future classes | 5 | 5 | 4 | 5 |  | 4.75 |
| Interest in geology | 5 | 5 | 5 | 4 |  | 4.75 |
| Desire to do more geology | 5 | 5 | 5 | 4 |  | 4.75 |
| Desire to major in geology | 5 | 5 | 5 | 3 |  | 4.5 |
| A connection to Earth | 5 | 5 | 5 | 3 |  | 4.5 |
| An appreciation of Earth’s beauty | 5 | 5 | 5 | 5 |  | 5 |
| A personal attachment to the McLaughlin Nature Reserve area | 4 | 5 | 4 | 3 |  | 4 |
| An amazement of the power of geological processes | 5 | 5 | 5 | 5 |  | 5 |
| **average** | **4.5** | **4.1** | **3.9** | **3.9** | **n/a** |  |

**Factors Questionnaire**

What factors had the largest POSITIVE effect on your belief in your ability to succeed as a geologist? Circle the ones that had the largest influence.

|  | Mary | Natasha | Emily | Rashid | Karl | sum |
| --- | --- | --- | --- | --- | --- | --- |
| Working as a team |  | 1 | 1 | 1 |  | 3 |
| Engaging in physical activity | 1 | 1 |  |  |  | 2 |
| Receiving feedback |  |  |  |  |  | 0 |
| Getting to know the other interns socially | 1 | 1 | 1 | 1 |  | 4 |
| Getting to know the professors socially | 1 | 1 | 1 |  |  | 3 |
| The weather in the field | 1 |  |  |  |  | 1 |
| Being tired, ill, or injured |  |  |  |  |  | 0 |
| The geology of the field area | 1 | 1 |  |  |  | 2 |
| The food |  |  |  |  |  | 0 |
| Learning while in the field | 1 | 1 | 1 |  |  | 3 |
| Learning while processing data |  |  |  |  |  | 0 |
| Learning while putting together the poster |  | 1 |  |  |  | 1 |
| Learning while doing background readings |  |  |  |  |  | 0 |
| Gaining a better sense of my ability to do geology |  |  |  | 1 |  | 1 |
| Learning more about geology topics | 1 | 1 |  |  |  | 2 |
| Learning more about what geologists do | 1 | 1 | 1 |  |  | 3 |
| Change in confidence in my ability to do geology |  | 1 | 1 | 1 |  | 3 |
| Forming a sense of community with the other interns | 1 | 1 |  | 1 |  | 3 |
| Interactions with the professors | 1 | 1 |  |  |  | 2 |
| Feeling a sense of belonging to the field of geology |  | 1 |  |  |  | 1 |
| Gaining mentors who can provide emotional support | 1 |  | 1 | 1 |  | 3 |
| Gaining mentors who can provide advice | 1 | 1 | 1 | 1 |  | 4 |
| Gaining sponsors who can provide support on how to use instruments and process data |  |  | 1 | 1 |  | 2 |
| Gaining role models who can act as examples | 1 | 1 |  |  |  | 2 |
| Receiving encouragement that I have the capabilities to be successful |  |  |  |  | 1 | 1 |
| Seeing other people who had to work hard to succeed |  |  | 1 |  |  | 1 |
| Other: |  |  |  |  |  | 0 |

What factors had the largest NEGATIVE effect on your belief in your ability to succeed as a geologist? Circle the ones that had the largest influence.

|  | Mary | Natasha | Emily | Rashid | Karl | sum |
| --- | --- | --- | --- | --- | --- | --- |
| Working as a team |  | 1 |  |  |  | 1 |
| Engaging in physical activity |  |  | 1 |  |  | 1 |
| Receiving feedback |  |  |  |  |  | 0 |
| Getting to know the other interns socially |  |  |  |  |  | 0 |
| Getting to know the professors socially |  |  |  |  |  | 0 |
| The weather in the field |  |  |  |  |  | 0 |
| Being tired, ill, or injured |  |  | 1 | 1 |  | 2 |
| The geology of the field area |  |  |  |  |  | 0 |
| The food |  | 1 |  |  |  | 1 |
| Learning while in the field |  |  |  |  |  | 0 |
| Learning while processing data | 1 |  | 1 |  |  | 2 |
| Learning while putting together the poster |  |  |  |  |  | 0 |
| Learning while doing background readings |  |  |  |  |  | 0 |
| Gaining a better sense of my ability to do geology | 1 |  |  |  |  | 1 |
| Learning more about geology topics |  |  |  | 1 |  | 1 |
| Learning more about what geologists do |  |  |  |  |  | 0 |
| Change in confidence in my ability to do geology | 1 |  |  |  | 1 | 2 |
| Forming a sense of community with the other interns |  |  |  |  |  | 0 |
| Interactions with the professors |  |  |  |  |  | 0 |
| Feeling a sense of belonging to the field of geology | 1 |  |  |  |  | 1 |
| Gaining mentors who can provide emotional support |  |  |  |  |  | 0 |
| Gaining mentors who can provide advice |  |  |  |  |  | 0 |
| Gaining sponsors who can provide support on how to use instruments and process data |  |  |  |  |  | 0 |
| Gaining role models who can act as examples |  |  |  |  |  | 0 |
| Receiving encouragement that I have the capabilities to be successful |  |  |  |  |  | 0 |
| Seeing other people who had to work hard to succeed |  |  |  |  |  | 0 |
| Other: division of labor of kitchen jobs |  | 1 |  |  |  | 1 |
